# Supplementary material
Source: PubMed Central journal article supplement (PMC4992610)
Supplement: NIHMS800165-supplement-1.pdf [file NIHMS800165-supplement-1.pdf]

**Supplemental Table 1.** Cohort of SIV infected rhesus macaques used for the study

| Animal Name        | Vaccination status             | Set-Point Viral Load (#) | Challenge Virus       | Route of Infection | Mamu A01 Status | Week of sampling |
|--------------------|--------------------------------|--------------------------|-----------------------|--------------------|-----------------|------------------|
| <b>Controllers</b> |                                |                          |                       |                    |                 |                  |
| RFe5               | Unvaccinated SIV-naïve animals | N/A                      | N/A                   | NA                 |                 | N/A              |
| RJi13              |                                | N/A                      | N/A                   | NA                 |                 | N/A              |
| RMg5               |                                | N/A                      | N/A                   | NA                 |                 | N/A              |
| RMu5               |                                | N/A                      | N/A                   | NA                 |                 | N/A              |
| ROs5               |                                | N/A                      | N/A                   | NA                 |                 | N/A              |
| RQi5               |                                | N/A                      | N/A                   | NA                 |                 | N/A              |
| RSg5               |                                | N/A                      | N/A                   | NA                 |                 | N/A              |
| RAz13              | Unvaccinated SIV-infected      | 46600                    | SIVmac <sub>251</sub> | Intra-rectal       | +               | 24               |
| RJi-13             |                                | 73100                    | SIVmac <sub>251</sub> | Intra-rectal       | +               | 24               |
| RFe14              |                                | 329000                   | SIVmac <sub>251</sub> | Intra-rectal       | -               | 24               |
| RSg14              |                                | 155000                   | SIVmac <sub>251</sub> | Intra-rectal       | -               | 24               |
| RQi14              |                                | 54900                    | SIVmac <sub>251</sub> | Intra-rectal       | +               | 24               |
| RUk13              |                                | 146000                   | SIVmac <sub>251</sub> | Intra-rectal       | +               | 24               |
| RCa12              |                                | 201000                   | SIVmac <sub>251</sub> | Intra-rectal       | -               | 24               |
| RKw13              |                                | 4050                     | SIVmac <sub>251</sub> | Intra-rectal       | -               | 24               |
| RTa14              |                                | 49500                    | SIVmac <sub>251</sub> | Intra-rectal       | -               | 24               |
| RJh14              |                                | 34700                    | SIVmac <sub>251</sub> | Intra-rectal       | +               | 24               |
| RQd13              |                                | 27300                    | SIVmac <sub>251</sub> | Intra-rectal       | -               | 24               |
| RLe-14             |                                | 523000                   | SIVmac <sub>251</sub> | Intra-rectal       | +               | 24               |
| RGq14              |                                | 2830                     | SIVmac <sub>251</sub> | Intra-rectal       | -               | 24               |
| RRg14              |                                | 2550                     | SIVmac <sub>251</sub> | Intra-rectal       | +               | 24               |
| RHg14              |                                | 36600                    | SIVmac <sub>251</sub> | Intra-rectal       | -               | 24               |
| RJb12              |                                | 279                      | SIVmac <sub>251</sub> | Intra-rectal       | +               | 32               |
| RHb12              |                                | 40                       | SIVmac <sub>251</sub> | Intra-rectal       | +               | 32               |
| RFF12              |                                | 4630                     | SIVmac <sub>251</sub> | Intra-rectal       | -               | 32               |
| RTt12              |                                | 5160                     | SIVmac <sub>251</sub> | Intra-rectal       | -               | 32               |
| RKo12              |                                | 609                      | SIVmac <sub>251</sub> | Intra-rectal       | -               | 32               |
| RJp12              |                                | 40                       | SIVmac <sub>251</sub> | Intra-rectal       | +               | 32               |
| RUf12              |                                | 544000                   | SIVmac <sub>251</sub> | Intra-rectal       | -               | 32               |
| RSa12              |                                | 17500                    | SIVmac <sub>251</sub> | Intra-rectal       | -               | 32               |
| RUp12              |                                | 3590                     | SIVmac <sub>251</sub> | Intra-rectal       | +               | 32               |
| REq12              |                                | 40                       | SIVmac <sub>251</sub> | Intra-rectal       | -               | 32               |
| RFI12              |                                | 40                       | SIVmac <sub>251</sub> | Intra-rectal       | -               | 32               |
| RA s12             |                                | 40                       | SIVmac <sub>251</sub> | Intra-rectal       | -               | 32               |
| RRc12              |                                | 68700                    | SIVmac <sub>251</sub> | Intra-rectal       | -               | 32               |
| RHu13              |                                | 13800                    | SIVmac <sub>251</sub> | Intra-rectal       | +               | 32               |
| RBr12              |                                | 595                      | SIVmac <sub>251</sub> | Intra-rectal       | -               | 32               |

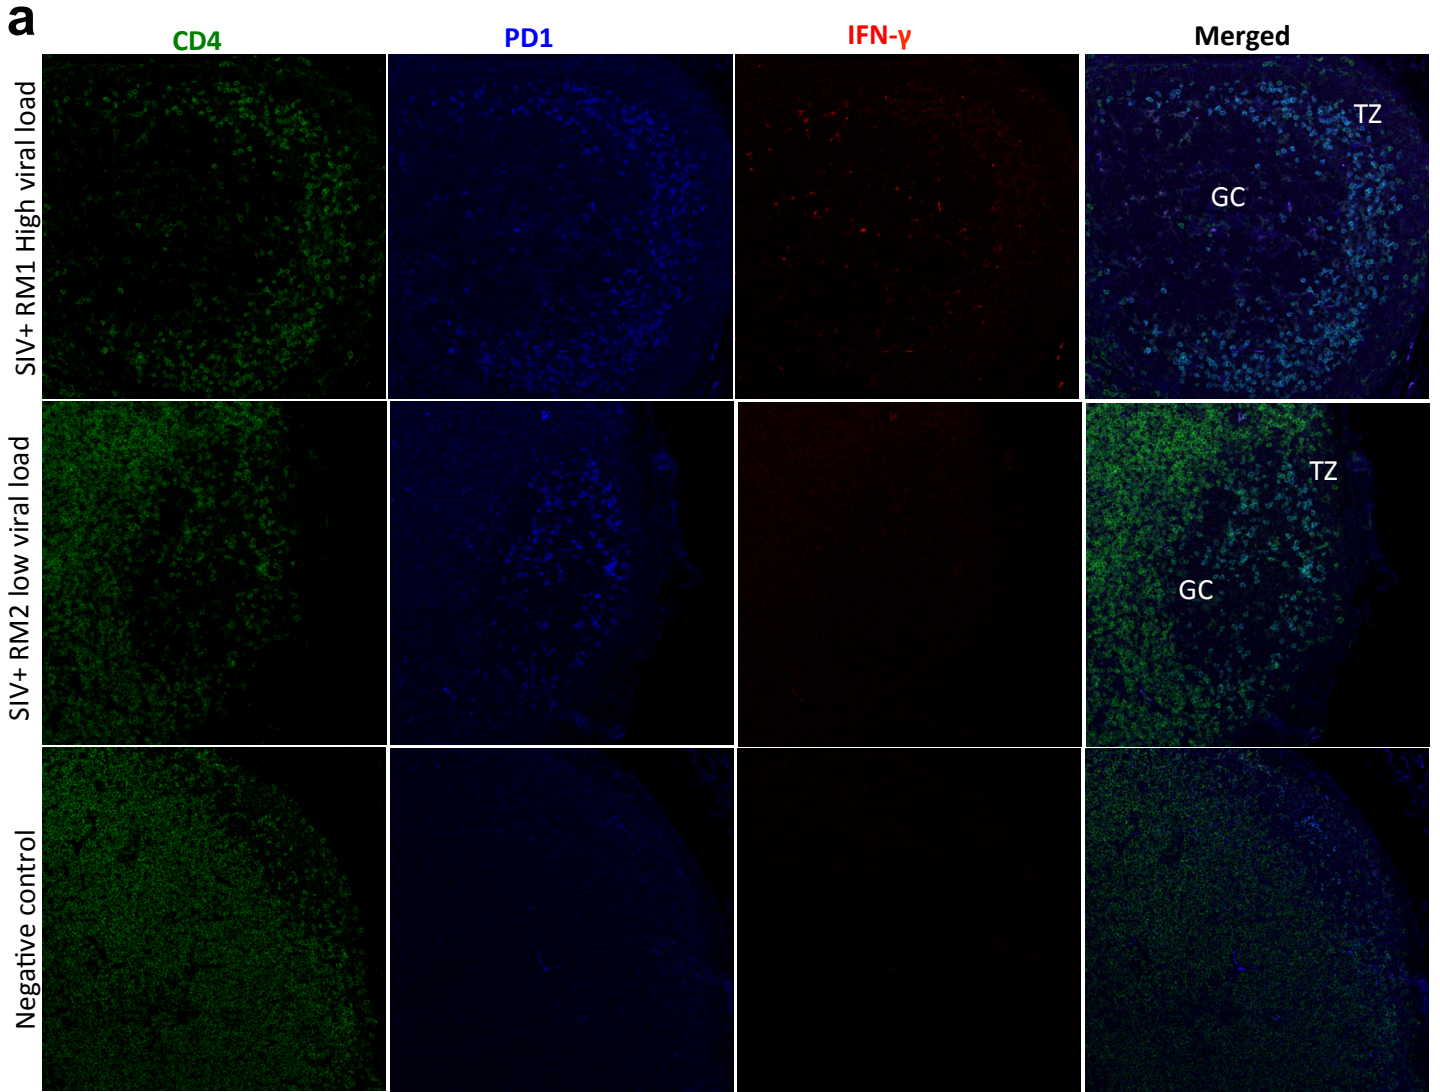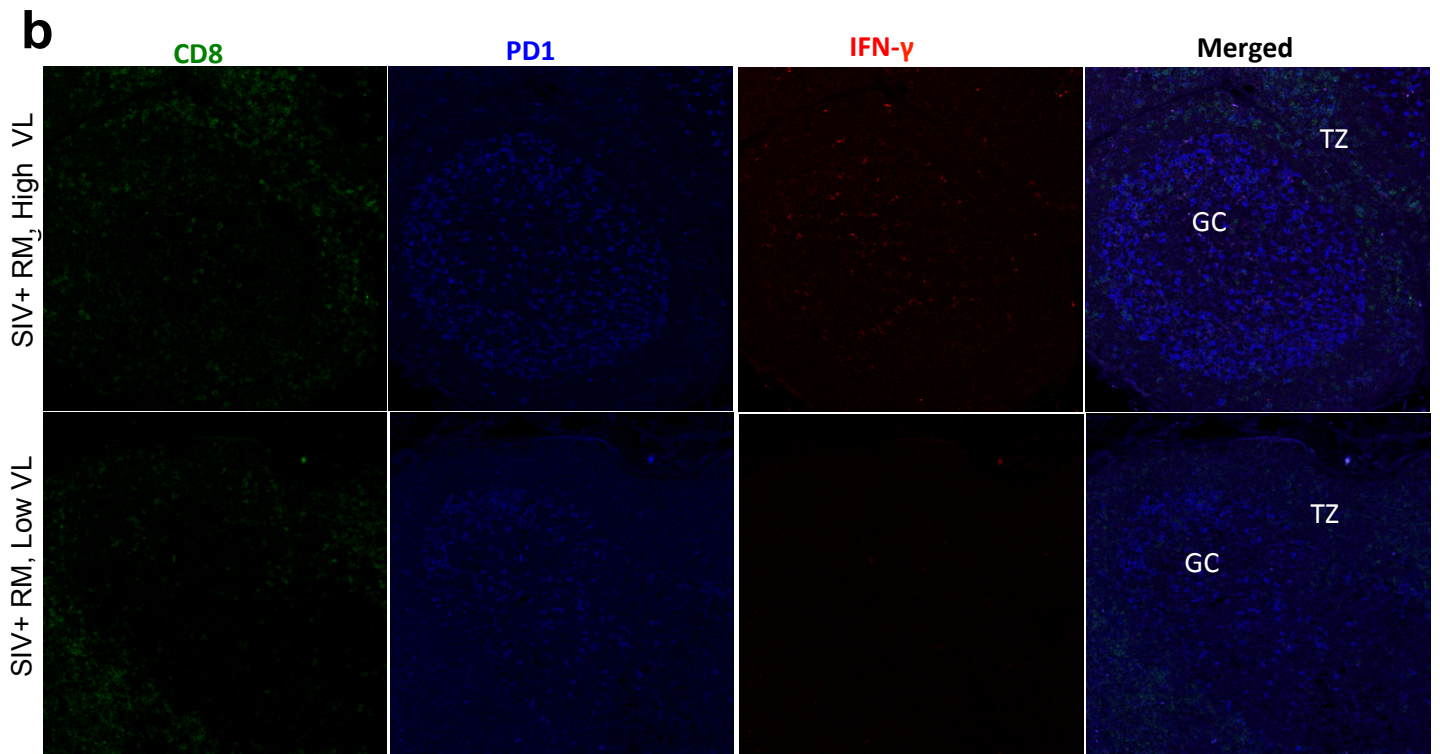

**Supplemental Figure 1: Chronic SIV infection results in accumulation of IFN- $\gamma$ <sup>+</sup> CD4 T cells but not CD8 T cells within the follicles. (a)** Representative immunofluorescence images characterizing CD4<sup>+</sup> IFN- $\gamma$ <sup>+</sup> cells in the GC/follicles of LNs from SIV-naïve and SIV<sup>+</sup> RMs with low (<100 copies) and high (>10,000 copies) viral load. **(b)** Representative immunofluorescence images characterizing CD8<sup>+</sup> IFN- $\gamma$ <sup>+</sup> cells in the GC/follicles of LNs from SIV<sup>+</sup> RMs with low (<100 copies) and high (>10,000 copies) viral load.
